# Supplementary material
Source: PubMed Central journal article supplement (PMC7848905)
Supplement: AEM.02326-20-s0001.pdf [file AEM.02326-20-s0001.pdf]

Table S1: DESeq2 results: bacterial ASVs significantly different in relative abundance between compartments.

| ASV     | Phylum             | Class               | Order              | Family              | Genus            | lfc <sup>a</sup> | lfcSE <sup>b</sup> | stat <sup>c</sup> | padj <sup>d</sup> |
|---------|--------------------|---------------------|--------------------|---------------------|------------------|------------------|--------------------|-------------------|-------------------|
| asv0122 | Proteobacteria     | Gammaproteobacteria | Steroidobacterales | Woeseiaceae         | Woeseia          | 24.370           | 2.310              | 10.548            | 0.000             |
| asv0135 | Proteobacteria     | Gammaproteobacteria | BD7-8              | NA                  | NA               | 5.817            | 1.622              | 3.587             | 0.004             |
| asv0165 | Cyanobacteria      | Oxyphotobacteria    | Chloroplast        | NA                  | NA               | 5.610            | 1.572              | 3.568             | 0.004             |
| asv0121 | Proteobacteria     | Deltaproteobacteria | Desulfobacterales  | Desulfobulbaceae    | Desulfopila      | 4.808            | 1.401              | 3.433             | 0.006             |
| asv0089 | Bacteroidetes      | Bacteroidia         | Bacteroidales      | Prolixibacteraceae  | Draconibacterium | 4.554            | 0.969              | 4.700             | 0.000             |
| asv0041 | Proteobacteria     | Deltaproteobacteria | Desulfobacterales  | Desulfobulbaceae    | Desulforhopalus  | 3.641            | 0.758              | 4.803             | 0.000             |
| asv0173 | Marinimicrobia     | NA                  | NA                 | NA                  | NA               | 3.616            | 0.774              | 4.673             | 0.000             |
| asv0105 | Bacteroidetes      | Bacteroidia         | Bacteroidales      | Marinilabiliaceae   | NA               | 3.597            | 0.908              | 3.959             | 0.001             |
| asv0138 | Proteobacteria     | Deltaproteobacteria | Myxococcales       | Sandaracinaceae     | NA               | 3.365            | 0.854              | 3.941             | 0.001             |
| asv0147 | Bacteroidetes      | Bacteroidia         | Flavobacteriales   | Flavobacteriaceae   | Aquibacter       | 3.305            | 0.926              | 3.570             | 0.004             |
| asv0098 | Bacteroidetes      | Bacteroidia         | Bacteroidales      | Prolixibacteraceae  | Draconibacterium | 3.161            | 0.846              | 3.736             | 0.003             |
| asv0118 | Fusobacteria       | Fusobacteriia       | Fusobacteriales    | Fusobacteriaceae    | Propionigenium   | 3.124            | 0.852              | 3.668             | 0.003             |
| asv0218 | Bacteroidetes      | Bacteroidia         | Chitinophagales    | Saprosiraceae       | NA               | 3.112            | 0.882              | 3.528             | 0.005             |
| asv0094 | Bacteroidetes      | Bacteroidia         | Bacteroidales      | SB-5                | NA               | 2.735            | 0.521              | 5.253             | 0.000             |
| asv0055 | Bacteroidetes      | Bacteroidia         | Flavobacteriales   | Flavobacteriaceae   | Maritimimonas    | 2.598            | 0.504              | 5.152             | 0.000             |
| asv0087 | Proteobacteria     | Deltaproteobacteria | Sva0485            | NA                  | NA               | 2.490            | 0.484              | 5.139             | 0.000             |
| asv0035 | Proteobacteria     | Deltaproteobacteria | Desulfobacterales  | Desulfobulbaceae    | NA               | 2.278            | 0.554              | 4.113             | 0.001             |
| asv0022 | Proteobacteria     | Gammaproteobacteria | B2M28              | NA                  | NA               | 2.039            | 0.561              | 3.637             | 0.004             |
| asv0034 | Proteobacteria     | Deltaproteobacteria | Desulfobacterales  | Desulfobulbaceae    | NA               | 2.020            | 0.533              | 3.791             | 0.002             |
| asv0018 | Proteobacteria     | Deltaproteobacteria | Desulfuromonadales | Sva1033             | NA               | 1.910            | 0.297              | 6.430             | 0.000             |
| asv0005 | Proteobacteria     | Deltaproteobacteria | Desulfobacterales  | Desulfobulbaceae    | NA               | 1.424            | 0.221              | 6.441             | 0.000             |
| asv0009 | Bacteroidetes      | Bacteroidia         | Bacteroidales      | Bacteroidetes BD2-2 | NA               | 1.343            | 0.247              | 5.430             | 0.000             |
| asv0036 | Proteobacteria     | Gammaproteobacteria | NA                 | NA                  | NA               | 1.315            | 0.381              | 3.450             | 0.006             |
| asv0002 | Epsilonbacteraeota | Campylobacteria     | Campylobacterales  | Sulfurovaceae       | Sulfurovum       | 1.134            | 0.174              | 6.501             | 0.000             |
| asv0004 | Epsilonbacteraeota | Campylobacteria     | Campylobacterales  | Sulfurovaceae       | Sulfurovum       | 0.962            | 0.187              | 5.153             | 0.000             |
| asv0020 | Bacteroidetes      | Bacteroidia         | Flavobacteriales   | Flavobacteriaceae   | NA               | -2.296           | 0.682              | -3.364            | 0.007             |
| asv0017 | Bacteroidetes      | Bacteroidia         | Bacteroidales      | Bacteroidetes BD2-2 | NA               | -2.402           | 0.715              | -3.358            | 0.007             |
| asv0068 | Epsilonbacteraeota | Campylobacteria     | Campylobacterales  | Thiovulaceae        | Sulfurimonas     | -2.855           | 0.842              | -3.392            | 0.007             |
| asv0003 | Epsilonbacteraeota | Campylobacteria     | Campylobacterales  | Thiovulaceae        | Sulfurimonas     | -2.940           | 0.590              | -4.982            | 0.000             |
| asv0011 | Epsilonbacteraeota | Campylobacteria     | Campylobacterales  | Arcobacteraceae     | Arcobacter       | -3.233           | 0.707              | -4.576            | 0.000             |
| asv0026 | Firmicutes         | Clostridia          | Clostridiales      | Lachnospiraceae     | NA               | -3.376           | 1.008              | -3.350            | 0.007             |
| asv0001 | Proteobacteria     | Gammaproteobacteria | Nitrosococcales    | Methylophagaceae    | NA               | -3.389           | 0.484              | -7.000            | 0.000             |
| asv0012 | Proteobacteria     | Gammaproteobacteria | Alteromonadales    | Colwelliaceae       | Colwellia        | -3.473           | 0.879              | -3.952            | 0.001             |
| asv0093 | Proteobacteria     | Alphaproteobacteria | Rhizobiales        | Rhizobiaceae        | Cohaesibacter    | -3.701           | 1.029              | -3.598            | 0.004             |
| asv0025 | Proteobacteria     | Gammaproteobacteria | Chromatiales       | Sedimenticolaceae   | NA               | -4.338           | 0.926              | -4.683            | 0.000             |
| asv0060 | Proteobacteria     | Gammaproteobacteria | Oceanospirillales  | Nitrincolaceae      | Amphritea        | -5.073           | 0.863              | -5.881            | 0.000             |
| asv0153 | Epsilonbacteraeota | Campylobacteria     | Campylobacterales  | Thiovulaceae        | Sulfurimonas     | -5.471           | 1.618              | -3.381            | 0.007             |
| asv0129 | Bacteroidetes      | Bacteroidia         | Bacteroidales      | Marinilabiliaceae   | Labilibacter     | -6.020           | 1.032              | -5.836            | 0.000             |
| asv0131 | Proteobacteria     | Deltaproteobacteria | Desulfobacterales  | Desulfobulbaceae    | Desulforhopalus  | -6.375           | 1.314              | -4.851            | 0.000             |
| asv0081 | Epsilonbacteraeota | Campylobacteria     | Campylobacterales  | Arcobacteraceae     | Arcobacter       | -6.530           | 1.451              | -4.501            | 0.000             |
| asv0023 | Cyanobacteria      | Oxyphotobacteria    | Chloroplast        | NA                  | NA               | -7.323           | 0.994              | -7.365            | 0.000             |
| asv0015 | Epsilonbacteraeota | Campylobacteria     | Campylobacterales  | Arcobacteraceae     | Arcobacter       | -7.365           | 0.945              | -7.794            | 0.000             |

<sup>a</sup> lfc: Log2-Fold Change (Rhizosphere/Root)

<sup>b</sup> lfcSE: Log2-Fold Change Standard Error

<sup>c</sup> stat: DESeq2 Test Statistic

<sup>d</sup> adjusted p-value: Benjamini-Hochberg FDR adjustment (Benjamini, Y., and Hochberg, Y. (1995). Journal of the Royal Statistical Society Series B, 57, 289–300.)

Table S2: CPGLMM results of *Z. marina* rhizosphere microbes with significant modeled coefficients for Intercepts (Treatment effect) and/or Slopes (Time x Treatment Interaction).

| Family                            | padj intercept <sup>a</sup> | padj slope <sup>a</sup> | p intercept | p slope | coeff intercept | coeff slope |
|-----------------------------------|-----------------------------|-------------------------|-------------|---------|-----------------|-------------|
| Ruminococcaceae                   | 0.0362                      | 0.0003                  | 0.0140      | 0.0000  | -2.5107         | 0.0772      |
| Sandaracinaceae                   | 0.0071                      | 0.0095                  | 0.0020      | 0.0006  | 2.6086          | -0.1098     |
| Rhizobiales Incertae Sedis        | 0.0000                      | 0.0145                  | 0.0000      | 0.0015  | 5.3061          | -0.1891     |
| Family XII                        | 0.0002                      | 0.0161                  | 0.0000      | 0.0018  | 2.0881          | -0.0907     |
| Sulfurovaceae                     | 0.0000                      | 0.0169                  | 0.0000      | 0.0021  | -0.8038         | 0.0250      |
| Chromatiaceae                     | 0.0278                      | 0.0221                  | 0.0101      | 0.0030  | 2.5110          | -0.1154     |
| Mitochondria                      | NS                          | 0.0056                  | 0.2147      | 0.0001  | -1.7061         | 0.1216      |
| Rhodobacteraceae                  | NS                          | 0.0069                  | 0.1870      | 0.0003  | -0.4555         | 0.0530      |
| Thiotrichaceae                    | NS                          | 0.0069                  | 0.7446      | 0.0003  | 0.8323          | -0.0579     |
| Bacteroidales unknown             | NS                          | 0.0105                  | 0.6650      | 0.0008  | -0.8446         | 0.0564      |
| Sulfurospirillaceae               | NS                          | 0.0122                  | 0.0710      | 0.0011  | -0.4319         | 0.0936      |
| PHOS-HE36                         | NS                          | 0.0337                  | 0.3963      | 0.0051  | 1.6347          | -0.1025     |
| Puniceococcaceae                  | NS                          | 0.0410                  | 0.0267      | 0.0067  | -1.7858         | 0.0769      |
| Prolixibacteraceae                | NS                          | 0.0429                  | 0.0552      | 0.0075  | -0.7010         | 0.0311      |
| Woeseiaceae                       | 0.0000                      | NS                      | 0.0000      | 0.0135  | 3.8388          | -0.1232     |
| BD7-8 unknown                     | 0.0000                      | NS                      | 0.0000      | 0.0389  | 92.1933         | -3.2501     |
| MidBa8                            | 0.0000                      | NS                      | 0.0000      | 0.0556  | -3.1286         | 0.0800      |
| Arcobacteraceae                   | 0.0000                      | NS                      | 0.0000      | 0.3524  | 0.5868          | 0.0150      |
| Bacteroidetes BD2-2               | 0.0000                      | NS                      | 0.0000      | 0.4667  | -0.7186         | 0.0091      |
| Sva0485 unknown                   | 0.0001                      | NS                      | 0.0000      | 0.9385  | -1.0274         | 0.0017      |
| Aminicenantales unknown           | 0.0007                      | NS                      | 0.0001      | 0.3686  | -3.2495         | 0.0614      |
| Flavobacteriaceae                 | 0.0009                      | NS                      | 0.0001      | 0.1348  | 0.1707          | 0.0122      |
| Bacteroidetes VC2.1 Bac22 unknown | 0.0012                      | NS                      | 0.0002      | 0.3482  | -1.0322         | 0.0191      |
| Kiritimatiellaceae                | 0.0012                      | NS                      | 0.0002      | 0.3722  | -1.9842         | 0.0361      |
| Kangiellaceae                     | 0.0012                      | NS                      | 0.0002      | 0.9123  | -3.2161         | 0.0137      |
| Vibrionaceae                      | 0.0013                      | NS                      | 0.0003      | 0.0175  | 1.2846          | -0.0558     |
| Clostridiales unknown             | 0.0017                      | NS                      | 0.0004      | 0.0404  | -2.3497         | 0.0730      |
| Desulfarculaceae                  | 0.0017                      | NS                      | 0.0003      | 0.5608  | -1.4059         | -0.0346     |
| Lentimicrobiaceae                 | 0.0022                      | NS                      | 0.0005      | 0.4866  | -1.2693         | 0.0197      |
| Saprosiraceae                     | 0.0037                      | NS                      | 0.0009      | 0.0918  | 0.2273          | 0.0281      |
| Izimaplasmataceae                 | 0.0040                      | NS                      | 0.0010      | 0.7628  | 0.8973          | 0.0092      |
| Latescibacteraceae                | 0.0040                      | NS                      | 0.0011      | 0.8977  | -2.3159         | -0.0112     |
| Desulfobacteraceae                | 0.0105                      | NS                      | 0.0030      | 0.7374  | -0.2745         | -0.0036     |
| Marinilabiliaceae                 | 0.0112                      | NS                      | 0.0034      | 0.5177  | -0.5261         | -0.0165     |
| Colwelliaceae                     | 0.0113                      | NS                      | 0.0035      | 0.1343  | 0.4155          | 0.0516      |
| WCHB1-41 unknown                  | 0.0220                      | NS                      | 0.0071      | 0.5389  | -2.3508         | 0.0424      |
| Proteobacteria unknown            | 0.0245                      | NS                      | 0.0083      | 0.8178  | 1.5059          | -0.0115     |
| Unknown Family                    | 0.0264                      | NS                      | 0.0092      | 0.1624  | -0.8442         | 0.0266      |
| Haliaceae                         | 0.0318                      | NS                      | 0.0119      | 0.3466  | -0.9307         | 0.0244      |
| Woesearchaeia unknown             | 0.0463                      | NS                      | 0.0185      | 0.0715  | -1.3702         | 0.0493      |

<sup>a</sup> padj: Benjamini-Hochberg FDR adjustment

Table S3: CPGLMM results of *Z. marina* root microbes with significant modeled coefficients for Intercepts (Treatment effect) and/or Slopes (Time x Treatment Interaction).

| Family                            | padj intercept <sup>a</sup> | padj slope <sup>a</sup> | p intercept | p slope | coeff intercept | coeff slope |
|-----------------------------------|-----------------------------|-------------------------|-------------|---------|-----------------|-------------|
| Vibrionaceae                      | 0.0006                      | 0.0003                  | 0.0001      | 0.0000  | 2.5618          | -0.1250     |
| Desulfobacteraceae                | 0.0053                      | 0.0006                  | 0.0010      | 0.0000  | -1.5928         | 0.0653      |
| Sulfurovaceae                     | 0.0000                      | 0.0398                  | 0.0000      | 0.0045  | -0.9518         | 0.0292      |
| Gammaproteobacteria unknown       | 0.0006                      | 0.0398                  | 0.0001      | 0.0048  | -1.8652         | 0.0618      |
| Ruminococcaceae                   | 0.0075                      | 0.0398                  | 0.0015      | 0.0047  | -2.7013         | 0.0963      |
| Lentimicrobiaceae                 | 0.0331                      | 0.0398                  | 0.0119      | 0.0036  | -3.0029         | 0.1190      |
| Desulfobulbaceae                  | NS                          | 0.0398                  | 0.1321      | 0.0018  | -0.5698         | 0.0291      |
| Prolixibacteraceae                | NS                          | 0.0398                  | 0.1831      | 0.0024  | -1.1274         | 0.0552      |
| Desulfuromonadaceae               | NS                          | 0.0398                  | 0.4447      | 0.0044  | -1.7078         | 0.0982      |
| Spirochaetaceae                   | NS                          | 0.0442                  | 0.6357      | 0.0059  | -0.8580         | 0.0475      |
| Family XII                        | 0.0000                      | NS                      | 0.0000      | 0.8192  | 2.0464          | -0.0076     |
| Arcobacteraceae                   | 0.0000                      | NS                      | 0.0000      | 0.1349  | 0.8259          | -0.0175     |
| Milano-WF1B-44 unknown            | 0.0000                      | NS                      | 0.0000      | 0.0861  | -1.1001         | 0.0254      |
| Bacteroidetes BD2-2               | 0.0002                      | NS                      | 0.0000      | 0.0268  | -0.9710         | 0.0282      |
| Sva0485 unknown                   | 0.0002                      | NS                      | 0.0000      | 0.2264  | -2.9168         | 0.0614      |
| Haliaceae                         | 0.0006                      | NS                      | 0.0001      | 0.9297  | -1.5484         | -0.0036     |
| Rhodobacteraceae                  | 0.0006                      | NS                      | 0.0001      | 0.0733  | -0.2798         | -0.0264     |
| B2M28 unknown                     | 0.0006                      | NS                      | 0.0001      | 0.3630  | -1.7880         | 0.0330      |
| Thiovulaceae                      | 0.0025                      | NS                      | 0.0004      | 0.2917  | -0.6728         | 0.0139      |
| Mariprofundaceae                  | 0.0045                      | NS                      | 0.0008      | 0.2261  | 0.3012          | 0.0707      |
| Unknown Family                    | 0.0116                      | NS                      | 0.0025      | 0.3822  | -1.0717         | 0.0226      |
| Bacteroidetes VC2.1 Bac22 unknown | 0.0119                      | NS                      | 0.0027      | 0.1061  | -1.6932         | 0.0514      |
| Anaerolineaceae                   | 0.0148                      | NS                      | 0.0038      | 0.2063  | -1.8215         | 0.0461      |
| Pirellulaceae                     | 0.0148                      | NS                      | 0.0036      | 0.3126  | -2.1341         | 0.0480      |
| Colwelliaceae                     | 0.0175                      | NS                      | 0.0047      | 0.1594  | 1.3529          | -0.0426     |
| Cyclobacteriaceae                 | 0.0233                      | NS                      | 0.0068      | 0.0332  | 0.0881          | -0.0745     |
| Nitrospiraceae                    | 0.0233                      | NS                      | 0.0066      | 0.7537  | 0.6226          | 0.0079      |
| Pseudoalteromonadaceae            | 0.0281                      | NS                      | 0.0086      | 0.8006  | 0.9853          | -0.0087     |
| JGI 0000069-P22 unknown           | 0.0326                      | NS                      | 0.0113      | 0.4628  | 0.6018          | 0.0249      |
| Rhizobiaceae                      | 0.0326                      | NS                      | 0.0106      | 0.1638  | -0.2354         | -0.0400     |
| SB-5                              | 0.0326                      | NS                      | 0.0110      | 0.0150  | -2.6256         | 0.0982      |
| Marinifilaceae                    | 0.0337                      | NS                      | 0.0126      | 0.7723  | 0.8651          | -0.0094     |
| Bacteroidia unknown               | 0.0380                      | NS                      | 0.0147      | 0.6902  | 0.7044          | 0.0157      |
| Psychromonadaceae                 | 0.0392                      | NS                      | 0.0157      | 0.4327  | 0.7206          | -0.0199     |
| Izimaplasmataceae                 | 0.0462                      | NS                      | 0.0191      | 0.0523  | -0.1934         | 0.1090      |

<sup>a</sup> padj: Benjamini-Hochberg FDR adjustment
